1 ***Plasmodiophora brassicae* infection threshold – how many resting spores are required for**  
2 **infection of canola (*Brassica napus*)**

3

4 **Kher Zahr<sup>1</sup>, Yalong Yang<sup>1</sup>, Alian Sarkes<sup>1</sup>, Snezana Dijanovic<sup>1</sup>, Heting Fu<sup>1</sup>, Michael W.**  
5 **Harding<sup>2</sup>, David Feindel<sup>1</sup>, Jie Feng<sup>1</sup>**

6

7 <sup>1</sup>The Alberta Plant Health Lab, Alberta Agriculture and Forestry, Edmonton, Alberta, Canada

8 <sup>2</sup>Crop Diversification Centre South, Alberta Agriculture and Forestry, Brooks, Alberta, Canada

9

10 \*Correspondence:

11 Jie Feng

12 E-mail: [jie.feng@gov.ab.ca](mailto:jie.feng@gov.ab.ca)

13

14

15

16

17

18

19

20

21

22

23

24 **Abstract**

25 Clubroot, caused by *Plasmodiophora brassicae*, is an important disease of canola and other  
26 brassica crops. Improved understanding of host and pathogen biology is frequently useful in  
27 guiding management strategies. In order to better understand infection thresholds, seven-day old  
28 seedlings of canola cultivar Westar were inoculated with serially diluted concentrations of *P.*  
29 *brassicae* resting spores. Controlled soil and plant inoculation assays were performed and the  
30 plants maintained in a greenhouse for 42 days and clubroot disease severity evaluated visually.  
31 Clubroot symptoms were observed in soils containing as low as one spore/mL soil and on plants  
32 inoculated with as few as  $\leq 100$  resting spores. These thresholds were lower than any previously  
33 reported. The results indicated the importance of highly sensitive detection methods for *P.*  
34 *brassicae* diagnosis and quantification methods for clubroot risk prediction in soils. Furthermore,  
35 these results highlighted the low probability of obtaining *P. brassicae* single spore isolates.

36

37 **Key Words**

38 Clubroot, diagnosis, *Plasmodiophora brassicae*, single-spore isolate, infection, APHL

39

40

41

42

43

## 44 **Introduction**

45 Clubroot, caused by the protist *Plasmodiophora brassicae* Woronin, is an important threat to  
46 Canadian canola (*Brassica napus*) production (Hwang et al. 2012). In the Canadian Prairies,  
47 clubroot was first identified on canola in 2003, in a dozen fields near Edmonton, Alberta (Tewari  
48 et al. 2005). The disease has since then spread throughout central Alberta (Strelkov et al. 2015)  
49 and has also been confirmed in canola fields in Saskatchewan (Ziesman et al. 2019), Manitoba  
50 (Froese et al. 2019), Ontario (Al-Daoud et al. 2018) and North Dakota (Chittem et al. 2014).  
51 *Plasmodiophora brassicae* can produce large numbers of resting spores, which can survive in the  
52 soil for up to 20 years (Wallenhammar 1996). Resting spores are the primary source of inoculum  
53 in natural conditions, thus, direct and indirect measurements of resting spores in soil have been  
54 extensively used for *P. brassicae* detection and diagnosis, and forecasting of clubroot risk.

55  
56 Many methods have been developed for clubroot diagnosis, among which PCR-based assays  
57 such as end-point PCR, quantitative PCR (qPCR) and digital PCR are the most sensitive and  
58 accurate (Faggian and Strelkov 2009). The sensitivities of the PCR diagnosis from soil were  
59 generally reported at 1000 spores/g soil for PCR (Cao et al. 2007), 500-1000 spores/g soil for  
60 qPCR (Wallenhammar et al. 2012; Li et al. 2013) and 100 spores/g soil for digital PCR (Wen et  
61 al. 2020).

62  
63 In 2016 and 2019, soil samples containing serial dilutions of resting spores were provided to  
64 plant health/diagnostic labs across Canada to evaluate their efficiency for PCR-based diagnosis  
65 of clubroot (J. Feng, unpublished). In both years, the efficiencies from the labs were similar to  
66 those previously reported so that all labs reported *P. brassicae* detection from 1000 spores/g soil  
67 samples, but this concentration was also the lower limit of detection for most labs. It was

68 believed that the lower limit of detection was comparable with the lowest concentration of  
69 resting spores in soil that could cause visible clubroot (Donald and Porter 2009). At the  
70 concentration of  $1 \times 10^3$  spores/g soil, *P. brassicae* may cause infection, but no aboveground  
71 symptoms and little impact on crop yield could be observed (Kageyama and Asano 2009).

72

73 These results indicated that many spores (i.e.  $1 \times 10^3$  spores/g soil) on or in the vicinity of a root  
74 hair would be required to establish an infection and subsequently generate clubroot galls. In  
75 other words,  $1 \times 10^3$  spores/g soil appeared to be near the lower limit concentration for clubroot  
76 establishment. With this infection threshold in mind, trying to obtain a single spore isolate of *P.*  
77 *brassicae* would be extremely difficult, or perhaps impossible. Previous studies reported that the  
78 efficiency of obtaining single spore isolates was low, as indicated by the ratio between plants  
79 with galls and total plants inoculated with single spores, for examples, three out of 450 (0.7%;  
80 Jones et al. 1982), eight out of 600 (1.3%; Scott 1985) and two out of 164 (1.2%; Voorrips 1996).  
81 Recently, Akarian et al. (2021) reported much higher efficiencies, with 2-22% depending on the  
82 origins of the isolates and a summarized efficiency of 8.5% (34 out of 400). However, all the  
83 above-mentioned single spore isolates were generated on Chinese cabbage. No single spore  
84 isolate has been obtained from canola.

85

86 With the illogicality between the perceptions that the establishment of clubroot infection in field  
87 conditions needs many spores, and that a single spore can cause infection and subsequently  
88 generate clubroot galls in the creation of single-spore isolates, we conducted this greenhouse  
89 study to investigate the clubroot infection thresholds with serious dilutions of *P. brassicae*  
90 resting spores in soil or on plant roots. The objectives were to 1) find the lowest spore

91 concentration in soil that could cause visible clubroot symptoms on canola, 2) measure the  
92 possibility/efficiency of infections caused by single spores and 3) determine the sensitivity of *P.*  
93 *brassicae* detection required to accurately estimate disease risk in soil.

94

## 95 **Materials and methods**

### 96 **Host plants and *Plasmodiophora brassicae* populations**

97 Clubroot-susceptible canola cultivar Westar was used as the host plant exclusively in this study.  
98 Two *P. brassicae* populations, one pathotype 3H and the other composed mainly of pathotype 5x,  
99 were mixed at the ratio 1:1 and the mixture was used to prepare inocula. Origins of these two  
100 populations, as well as population maintenance and gall mixture preparation followed Zahr et al  
101 (2021). Resting spore suspensions were prepared according to Zhang et al. (2015) from samples  
102 of the gall mixture.

103

### 104 **Soil inoculation assay**

105 The spore suspension was adjusted to  $1 \times 10^8$ /mL, from which further dilutions were prepared.  
106 Two-L square plastic pots were filled at 1.5 L per pot with soilless mix (Sunshine mix #4, Sun  
107 Gro Horticulture, Vancouver, BC, Canada). The pots were soaked in water for 5 hours and then  
108 kept on greenhouse benches overnight to drain the excess water. The weight of 1.5 L soilless mix  
109 at this time point was  $1464.4 \text{ g} \pm 33.3$  (mean  $\pm$  SD,  $n = 10$ ). The soilless mix from ten pots was  
110 poured into a 46-L concrete mixer. With the mixer rotating at 35 rpm, the soilless mix was  
111 inoculated with resting spores by spraying 150 mL of a spore suspension using a plastic spray  
112 bottle. After inoculation, the mixer kept rotating at 35 rpm for 10 min. The inoculated soilless  
113 mix was used to re-fill the ten pots. The inoculation was conducted with a set of 10 $\times$  serial

114 dilutions of resting spore from  $1 \times 10^8$  spores/mL to  $1 \times 10^2$  spores/mL, which resulted in ten  
115 pots of inoculated soilless mix at each of the seven concentrations from  $1 \times 10^6$  spores/mL  
116 soilless mix to 1 spore/mL soilless mix. In addition, ten pots of soilless mix inoculated with 150  
117 mL water were also prepared. The inoculations were conducted with the order from low spore  
118 concentrations to high spore concentrations. Immediately after inoculation, ten seedlings of  
119 Westar, generated from seeds on moist filter paper at 24°C and 16-h photoperiod for seven days,  
120 were transplanted into each pot. The pots were placed in individual plates on greenhouse benches  
121 as randomized complete blocks (n = 10) with one block occupying one bench and the eight pots  
122 in each block being 2 feet away to each other. The greenhouse was maintained at 24°C/18°C  
123 (day/night) with a 16-h photoperiod. Starting from the third day after inoculation (dai), the pots  
124 were watered from the bottom every second day with tap water at pH 6.4 (adjusted with HCl).  
125 This assay was conducted twice.

126

### 127 **Plant inoculation assay**

128 Small pieces of filter paper (7 mm in diameter) were prepared using a paper punch. One piece of  
129 the filter paper was placed into the cap of a 1.5-mL microcentrifuge tube that had been cut off  
130 from the tube. The filter paper was misted with 25  $\mu$ L water and a canola seed was placed at the  
131 centre of the paper. The caps were incubated in a transparent plastic bag at 24°C with a 16-h  
132 photoperiod. After seven days, a set of 10 $\times$  serial dilutions of resting spore suspensions was  
133 prepared, from  $1 \times 10^7$  spores/mL to  $1 \times 10^3$  spores/mL. The root of the seedling in each cap was  
134 inoculated with 1  $\mu$ L of spore suspension taken from one of the serial dilutions (Fig. 1). One  $\mu$ L  
135 water was used as the negative control treatment. After inoculation, the caps were kept in the  
136 transparent plastic bag at 24°C with a 16-h photoperiod. After 48 hours, the seedlings were

137 transplanted into 500-mL plastic pot filled with soilless mix (Sunshine mix #4) with one plant  
138 per pot. The transplanting was done by picking up the filter paper on which the seedling was  
139 situated and burying the lower part of the stem, the root and the filter paper into the soilless mix.  
140 After transplanting, the pots were placed 1 foot apart on individual plates on greenhouse benches  
141 in a completely randomized design. Greenhouse conditions and watering were identical as the  
142 soil inoculation assay. This assay was conducted three times. In each experiment, for all  
143 treatments (spore concentrations) except  $1 \times 10^3$  spores/mL, 30 plants were inoculated. For the  
144 treatment of  $1 \times 10^3$  spores/mL, 180, 170 and 165 plants were inoculated in the first, second and  
145 third experiments, respectively.

146

#### 147 **Spore counting**

148 In each of the three plant inoculation experiments, a 40-mL aliquot was taken from the  $1 \times 10^3$   
149 spores/mL inoculum right before inoculation and kept at 4°C for less than 3 hours. In a 50-mL  
150 centrifuge tube, the aliquot was centrifuged at 4000 rcf for 10 min. After remove the supernatant,  
151 the pellet was dissolved in 4 mL water, making a spore suspension at  $1 \times 10^4$  spores/mL. Using a  
152 hemocytometer (Fisher Scientific Canada, Ottawa, ON; cat number: 02-671-6) bearing two 0.1-  
153  $\mu$ L counting chambers, spore number in 0.1- $\mu$ L samples was counted 300 times for the first  
154 experiment and 100 times for the second and the third experiments under a Leica DM500  
155 microscope (Leica Microsystems Canada, Concord, ON), with 12  $\mu$ L sample applied on the  
156 chamber for each counting.

157

#### 158 **Clubroot rating**

159 For the soil inoculation assay, clubroot severity on each plant was evaluated at 42 dai using a 0-  
160 to-3 scale (Kuginuki et al. 1999), where 0 = no clubbing, 1 < one-third of the root with  
161 symptoms of clubbing, 2 = one-thirds to two-thirds clubbed, and 3 > two-thirds clubbed. Severity  
162 ratings on all the ten plants in each pot were converted to an index of disease (ID) using the  
163 formula of Strelkov et al. (2006). For the plant inoculation assay, the presence or absence of  
164 clubroot galls on each plant were visually investigated at 42 day after transplanting.

165

## 166 **Statistics**

167 All statistics was done using Microsoft Excel. In the soil inoculation assay, data from each  
168 experiment was subjected to analysis of variance (ANOVA). Based on the ANOVA results,  
169 differences between treatments (spore concentrations in the soil) were assessed with Tukey's  
170 multiple comparison test ( $P \leq 0.05$ ) using the Excel add-in DSAASTAT developed by Dr. Onofri  
171 at the University of Perugia, Italy (<http://www.casaonofri.it/repository/DSAASTAT.xls>).  
172 In the spore counting assay, calculation of Poisson distribution and Chi square test were  
173 conducted with the POISON.DIST function and the CHISQ.TEST function, respectively.

174

## 175 **Results**

### 176 **Soil inoculation assay**

177 In the two repeated experiments of the soil inoculation assay, tiny galls, rated as severity scale 1,  
178 were observed on plants in the treatment of 1 spore/mL soil (Fig. 2A and B), with two plants in  
179 experiment 1 (in alternative pots) and one plant in experiment 2. In both experiments, large galls  
180 were observed on plants in the treatments of  $\geq 10$  spores/mL soil (Fig. 2C). No gall was observed  
181 in the treatment of water control (Fig. 2D). The disease index (ID) curves from the two



182 experiments were similar (Fig. 3). In both experiments, there were significant differences  
183 between the ID of  $< 1000$  spores/mL soil treatments and those of  $\geq 1000$  spores/mL soil  
184 treatments. These results indicated that clubroot infection can occur when the spore  
185 concentration is at 1 spore/mL soil, albeit at a low frequency, and that 1000 spores/mL soil is a  
186 key spore concentration threshold for appearance of visible clubroot disease symptoms.

187

### 188 **Single spore counting**

189 At very low concentrations, the distribution of particles in aliquots follows a Poisson distribution  
190 (Ahrberg et al. 2018). We calculated the possibilities of obtaining certain numbers of spores in a  
191 1- $\mu$ L aliquot from a 1 spore/ $\mu$ L solution (Table 1). The possibility of obtaining  $\geq 1$  spore would  
192 be 63.21% (1-36.79%). To verify that the number of spores in the 1- $\mu$ L samples taken from the 1  
193  $\times 10^3$  spores/mL inoculum followed the Poisson distribution, we counted the spores 300 times  
194 for the first and 100 times for the second and the third inoculation experiment. Since the  
195 hemocytometer was designed for counting spore numbers in a volume of 0.1  $\mu$ L, all countings  
196 were conducted after concentrating the  $1 \times 10^3$  spores/mL inoculum to  $1 \times 10^4$  spores/mL. The  
197 three counting experiments showed similar patterns to those of the calculated Poisson  
198 distribution, all with Chi square values supporting goodness of fit (Table 1). This result indicated  
199 that in our plant inoculation assay, approximately 63% of the plants treated with 1  $\mu$ L of the  $1 \times$   
200  $10^3$  spores/mL suspension were inoculated by one or more spore(s).

201

### 202 **Plant inoculation assay**

203 In the three plant inoculation experiments, 515 plants were inoculated with a 1- $\mu$ L aliquot of  
204 spore suspension at the concentration of  $1 \times 10^3$  spores/mL (Table 2). A single gall was observed

205 from one of the 515 plants (Fig. 4). A single gall was also observed from one of the 90 plants and  
206 one of the 89 plants inoculated with 1- $\mu$ L aliquots of a spore suspension at the concentration of 1  
207  $\times 10^4$  spores/mL and 1  $\times 10^5$  spores/mL, respectively. In contrast, galls, either single or multiple,  
208 were observed on 11 and 33 plants inoculated with 1- $\mu$ L aliquots of a spore suspension at the  
209 concentration of 1  $\times 10^6$  spores/mL and 1  $\times 10^7$  spores/mL, respectively. These results indicated  
210 that the infection efficiency was very low when the spore number was less than 1000.

211

## 212 **Discussion**

213 The results from the soil inoculation assay indicated that 1 spore/mL (approximately 1 spore/g)  
214 of soil was sufficient to obtain visible clubroot symptoms. Currently, the lower limit of PCR-  
215 based *P. brassicae* detection from soil is approximately 1000 spores/g soil. This finding revealed  
216 a potentially urgent need of more sensitive *P. brassicae* detection methods for soil samples.  
217 Detection thresholds lower than 1000 spores/g soil have occasionally reported, for example, by  
218 using digital PCR. However, we would hesitate to use a PCR or qPCR system that reported  
219 detection of *P. brassicae* from a spore concentration as low as 1 spore/g soil. This is because if  
220 DNA was extracted from a soil sample containing 1 spore and then only a small portion (e.g. 1  
221 out of 50  $\mu$ L) of the resultant DNA was used as the template in a PCR reaction, it would be  
222 almost impossible to amplify a single-copy DNA fragment. Furthermore, if a DNA sample  
223 extracted from 1000 resting spores was used to make serial dilutions and subsequent PCR or  
224 qPCR amplifications could produce positive signal from the 1000 $\times$  dilution, it should not be  
225 concluded that the protocol could detect the pathogen in a soil or root sample containing one  
226 spore. This is because the efficiency of DNA extraction is affected by both the plant or soil  
227 background and the proportion of target in the sample mixture. The efficiency of a PCR

228 detection system is not only dependent on the PCR reaction per se, but also significantly  
229 influenced by sample preparation method and how the DNA was extracted. For example, one  
230 might extract DNA from 100 mg of soil and another might first purify the resting spores from 50  
231 g of the soil sample and then extract DNA from the purified spores.

232

233 For a PCR-based detection method, regardless of the reaction sensitivity, at least one copy of the  
234 target DNA fragment must be present in the template. Most commercial DNA extraction kits  
235 recommend using less than 200 mg starting material for DNA extraction and dissolving the  
236 resultant DNA in 50-100  $\mu$ L water or the provided buffer, which would dilute the copy number  
237 of the target fragment present in the template. Thus, we proposed the following points one  
238 should consider when developing and advocating new PCR-based methods for *P. brassicae*  
239 detection: 1) try to target a DNA region with multiple copies in the genome, 2) define what  
240 sample was used for DNA extraction, i.e., from purified spores or directly from soil and 3)  
241 indicate the lowest number of spores from which the DNA in one positive reaction was derived.  
242 These points should also be considered when interpreting results from previously published  
243 PCR-based detection or quantification studies.

244

245 In this study we had initially tried to create single spore isolates for *P. brassicae*, but it was  
246 extremely difficult to confirm the presence of a single spore in an inoculum sample. Not only  
247 was it practically impossible to see a single spore on any solid surface under a microscope, but  
248 also with spores suspended in water, the lack of contract, and the movement/vibration of the  
249 spores, made the single-spore determination very challenging. These circumstances led to  
250 ambiguous results and unfruitful, yet time consuming, evaluations. Furthermore, when only one

251 or a few particles are present in a droplet, it is difficult to differentiate resting spores from starch  
252 grains or other debris of similar size. Due to these complications, we bypassed the step of single  
253 spore isolation and utilized the calculated probabilities of obtaining single spores based on  
254 Poisson distribution. Our results from the spore counting assay indicated that the 1- $\mu$ L aliquots  
255 taken from the  $1 \times 10^3$  spores/mL suspension could be used to assess the efficiency of single  
256 spore isolation.

257

258 Although we obtained one gall from the 515 plants inoculated by 1  $\mu$ L of the  $1 \times 10^3$  spores/mL  
259 suspension, only one gall was obtained from 90 and 89 plants inoculated by 1  $\mu$ L of  $1 \times 10^4$   
260 spores/mL and  $1 \times 10^5$  spores/mL suspensions, respectively. There are two possible reasons for  
261 this low efficiency: 1) a *P. brassicae* infection may need more than one spore or 2) single-spore  
262 infection on canola is rarer compared to that on Chinese cabbage. The low infection efficiencies  
263 of the inocula containing less than 1000 spores, along with the difficulties visualizing single  
264 spores within a spore suspension, had prevented the generation of single-spore populations of *P.*  
265 *brassicae*, not only in this study, but also in others (J. Feng unpublished data). It also became  
266 evident that there is currently no way to demonstrate that an obtained population was single-  
267 spore derived because without verification of single spore inoculum, resulting root galls may  
268 result from infection by two or more spores that are genetically identical.

269

270 We could not directly compare our results from the soil inoculation assay and the plant  
271 inoculation assay because there was no way to measure how many spores in the soil contributed  
272 to the observed infection. The microenvironment in soil will influence resting spore germination  
273 and zoospore infection in a very different way than those directly applied to the root surface.

274 Nevertheless, the results of both assays demonstrated that the inoculum concentrations in soil  
275 and on plant required for the establishment of visible clubroot symptoms is lower and higher,  
276 respectively, than previously thought.

277

278 In summary, we concluded from this study that 1) in 1 spore/mL soil *P. brassicae* is able to  
279 cause clubroot, and as a consequence the sensitivity of *P. brassicae* detection and quantification  
280 needs to be increased and 2) the efficiency of *P. brassicae* single spore canola root infections is  
281 very low.

282

### 283 **Funding information**

284 Financial support was received from Canadian Agricultural Partnership (no. 601322).

### 285 **Compliance with ethical standards**

### 286 **Conflict of interest**

287 The authors declare that they have no conflict of interest.

### 288 **Research involving human and/or animals**

289 No animals or data from human participants were involved in this study.

290

### 291 **References**

292 Ahrberg, C. D., Lee, J. M., & Chung, B. G. (2018). Poisson statistics-mediated particle/cell  
293 counting in microwell arrays. *Scientific Reports*, 8(1), 1-9.

294 Al-Daoud, F., Moran, M., Gossen, B., & McDonald, M. R. (2018). First report of clubroot  
295 (*Plasmodiophora brassicae*) on canola in Ontario. *Canadian Journal of Plant Pathology*,  
296 40(1), 96-99.

- 297 Akarian, H., Akhavan, A., Manolii, V. P., Cao, T., Hwang, S. B., & Strelkov, S. E. (2021).  
298 Virulence spectrum of single-spore and field isolates of *Plasmodiophora brassicae* able to  
299 overcome resistance in canola (*Brassica napus*). *Plant Disease*, *105*(1), 43-52.
- 300 Cao, T., Tewari, J., & Strelkov, S. E. (2007). Molecular detection of *Plasmodiophora brassicae*,  
301 causal agent of clubroot of crucifers, in plant and soil. *Plant Disease*, *91*(1), 80-87.
- 302 Chittem, K., Mansouripour, S. M., & del Río Mendoza, L. E. (2014). First report of clubroot on  
303 canola caused by *Plasmodiophora brassicae* in North Dakota. *Plant Disease*, *98*(10), 1438.
- 304 Donald, C., & Porter, I. (2009). Integrated control of clubroot. *Journal of Plant Growth*  
305 *Regulation*, *28*(3), 289-303.
- 306 Faggian, R., & Strelkov, S. E. (2009). Detection and measurement of *Plasmodiophora brassicae*.  
307 *Journal of Plant Growth Regulation*, *28*(3), 282-288.
- 308 Froese, R. D., Derksen, H., Guo, X., & McLaren, D. L. (2019). Monitoring and occurrence of  
309 clubroot in Manitoba in 2018. *Canadian Plant Disease Surveys*, *99*, 179.
- 310 Hwang, S. B., Strelkov, S. E., Feng, J., Gossen, B. D., & Howard, R. J. (2012). *Plasmodiophora*  
311 *brassicae*: a review of an emerging pathogen of the Canadian canola (*Brassica napus*) crop.  
312 *Molecular Plant Pathology*, *13*(2), 105-113.
- 313 Jones, D. R., Ingram, D. S., & Dixon, G. R. (1982). Characterization of isolates derived from  
314 single resting spores of *Plasmodiophora brassicae* and studies of their interaction. *Plant*  
315 *Pathology*, *31*(3), 239-246.
- 316 Kageyama, K., & Asano, T. (2009). Life cycle of *Plasmodiophora brassicae*. *Journal of Plant*  
317 *Growth Regulation*, *28*(3), 203-211.

- 318 Kuginuki, Y., Yoshikawa, H., & Hirai, M. (1999). Variation in virulence of *Plasmodiophora*  
319 *brassicae* in Japan tested with clubroot-resistant cultivars of Chinese cabbage (*Brassica rapa*  
320 *L. ssp. pekinensis*). *European Journal of Plant Pathology*, 105(4), 327-332.
- 321 Li, J. P., Yan, L. I., Shi, Y. X., Xie, X. W., Chai, A., & Li, B. J. (2013). Development of a real-  
322 time PCR assay for *Plasmodiophora brassicae* and its detection in soil samples. *Journal of*  
323 *Integrative Agriculture*, 12(10), 1799-1806.
- 324 Scott, E. S. (1985). Production and characterization of single-spore isolates of *Plasmodiophora*  
325 *brassicae*. *Plant Pathology*, 34(2), 287-292.
- 326 Strelkov, S. E., Manolii, V. P., Harding, M. W., Hwang, S. B., Fei, W., Rong, S., Burke, D. A.,  
327 Pugh, C. A., Nielsen, J. M., Barnes, A., & Jacobsen, C. (2015). The spread of clubroot on  
328 canola in Alberta in 2014. *Canadian Plant Disease Surveys*, 95, 155-158.
- 329 Strelkov, S. E., Tewari, J. P., & Smith-Degenhardt, E. (2006). Characterization of  
330 *Plasmodiophora brassicae* populations from Alberta, Canada. *Canadian Journal of Plant*  
331 *Pathology*, 28(3), 467-474.
- 332 Tewari, J. P., Strelkov, S. E., Orchard, D., Hartman, M., Lange, R. M., & Turkington, T. K.  
333 (2005). Identification of clubroot of crucifers on canola (*Brassica napus*) in Alberta.  
334 *Canadian Journal of Plant Pathology*, 27(1), 143-144.
- 335 Voorrips, R. E. (1996). Production, characterization and interaction of single-spore isolates of  
336 *Plasmodiophora brassicae*. *European Journal of Plant Pathology*, 102(4), 377-383.
- 337 Wallenhammar, A. C. (1996). Prevalence of *Plasmodiophora brassicae* in a spring oilseed rape  
338 in central Sweden and factors influencing soil infestation levels. *Plant Pathology* 45(4), 710-  
339 719.

- 340 Wallenhammar, A. C., Almquist, C., Söderström, M., & Jonsson, A. (2012). In-field distribution  
341 of *Plasmodiophora brassicae* measured using quantitative real-time PCR. *Plant Pathology*,  
342 61(1), 16-28.
- 343 Wen, R., Lee, J., Chu, M., Tonu, N., Dumonceaux, T., Gossen, B. D., Yu, F., & Peng, G. (2020).  
344 Quantification of *Plasmodiophora brassicae* resting spores in soils using droplet digital PCR  
345 (ddPCR). *Plant Disease*, 104(4), 1188-1194.
- 346 Zahr, K., Sarkes, A., Yang, Y., Zhou, Q., Feindel, D., Harding, M. W., & Feng, J. (2019).  
347 *Plasmodiophora brassicae* in its environment-effects of temperature and light on resting spore  
348 survival in soil. *bioRxiv*, 819524.
- 349 Zhang, H., Feng, J., Zhang, S., Zhang, S., Li, F., Strelkov, S. E., Sun, R., & Hwang, S. B. (2015).  
350 Resistance to *Plasmodiophora brassicae* in *Brassica rapa* and *Brassica juncea* genotypes  
351 from China. *Plant Disease* 99(6), 776-779.
- 352 Ziesman, B., Avila, R., Ursu, K., Kwasnicki, J., Roszell, L., Baraniecki, C., Johnson, B., Fennig,  
353 C., Makohoniuk, K., Junek, S., & Peru, C. (2019). 2018 clubroot survey and known  
354 occurrence of clubroot in Saskatchewan. *Canadian Plant Disease Surveys*, 99, 159-161.  
355



356 **Table 1.** Counting of *Plasmodiophora brassicae* resting spores in 0.1- $\mu$ L aliquots taken from  
 357 resting spore suspensions at a concentration of  $1 \times 10^4$  spores/mL

| Spores<br>per count       | Expected<br>ratio (%)* | Experiment 1 |          | Experiment 2 |          | Experiment 3 |          |
|---------------------------|------------------------|--------------|----------|--------------|----------|--------------|----------|
|                           |                        | Observed     | Expected | Observed     | Expected | Observed     | Expected |
| 0                         | 36.79                  | 114          | 110      | 35           | 37       | 31           | 37       |
| 1                         | 36.79                  | 112          | 110      | 33           | 37       | 38           | 37       |
| 2                         | 18.39                  | 55           | 55       | 23           | 18       | 20           | 18       |
| $\geq 3$                  | 8.03                   | 19           | 24       | 9            | 8        | 11           | 8        |
| Chi square                |                        | 1.220        |          | 1.747        |          | 2.189        |          |
| Two-tailed <i>P</i> value |                        | 0.7482       |          | 0.6264       |          | 0.5341       |          |

358 \*Ratios of obtaining the corresponding spore numbers if the countings conform to Poison  
 359 distribution.

360

361 **Table 2.** Inoculation of canola roots with 1- $\mu$ l aliquots of serially diluted concentrations of  
 362 *Plasmodiophora brassicae* resting spores

| Spores | Experiment 1 |      | Experiment 2 |      | Experiment 3 |      | In Total |      |
|--------|--------------|------|--------------|------|--------------|------|----------|------|
|        | Plant        | Gall | Plant        | Gall | Plant        | Gall | Plant    | Gall |
| 0      | 29           | 0    | 30           | 0    | 30           | 0    | 89       | 0    |
| 1      | 170          | 0    | 180          | 1    | 165          | 0    | 515      | 1    |
| 10     | 30           | 0    | 30           | 1    | 30           | 0    | 90       | 1    |
| 100    | 30           | 0    | 30           | 0    | 29           | 1    | 89       | 1    |
| 1000   | 29           | 3    | 30           | 4    | 30           | 4    | 89       | 11   |
| 10000  | 30           | 10   | 30           | 12   | 30           | 11   | 90       | 33   |

363

364 **Figure Legends**

365 **Fig 1.** Inoculation of seven-day-old canola seedling with 1  $\mu\text{L}$  *Plasmodiophora brassicae* resting  
366 spores. The arrow indicates the inoculated root.

367

368 **Fig. 2.** Galls developed on canola 42 days after growing in soil inoculated with *Plasmodiophora*  
369 *brassicae* resting spores at the final concentration of 1 spore/mL soil (a and b) and 10 spores/mL  
370 soil (c) or inoculated with water as the negative control (d). A tiny gall in (a) is indicated by an  
371 arrow and this part of (a) is magnified in (b).

372

373 **Fig 3.** Disease index of clubroot developed on canola 42 days after growing in soil that was  
374 inoculated with *Plasmodiophora brassicae* resting spores at final concentrations from 0 to  $1 \times$   
375  $10^6$  spores/mL soil. Means in the plots topped by the same letter do not differ based on Tukey's  
376 multiple comparison test at  $P \leq 0.05$  ( $n = 10$ ).

377

378 **Fig. 4.** A gall developed on a canola plant inoculated with 1  $\mu\text{L}$  *Plasmodiophora brassicae*  
379 resting spores at a concentration of  $1 \times 10^3$  spores/mL and transplanted into soil 48 hours after  
380 inoculation. Photo was taken at 42 day after transplanting. The area indicated by the arrow is  
381 enlarged in the lower right.

382

383

384

385

386

387 **Fig 1**

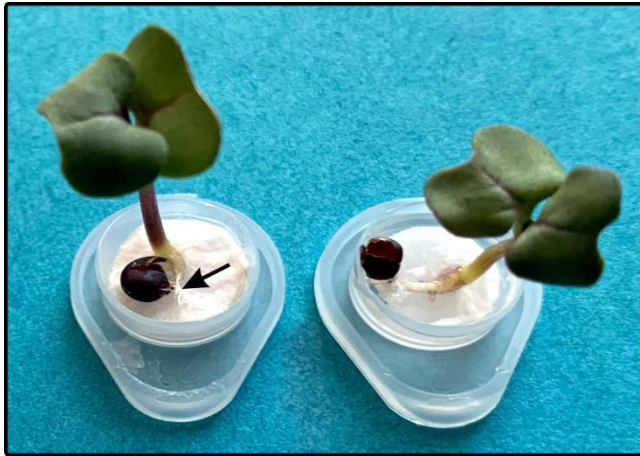

388

389 **Fig 2**

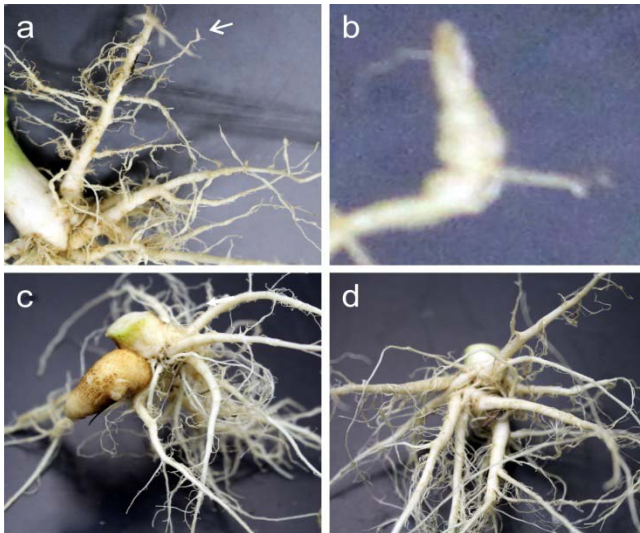

390

391

392

393

394

395

396

397

398 **Fig 3**

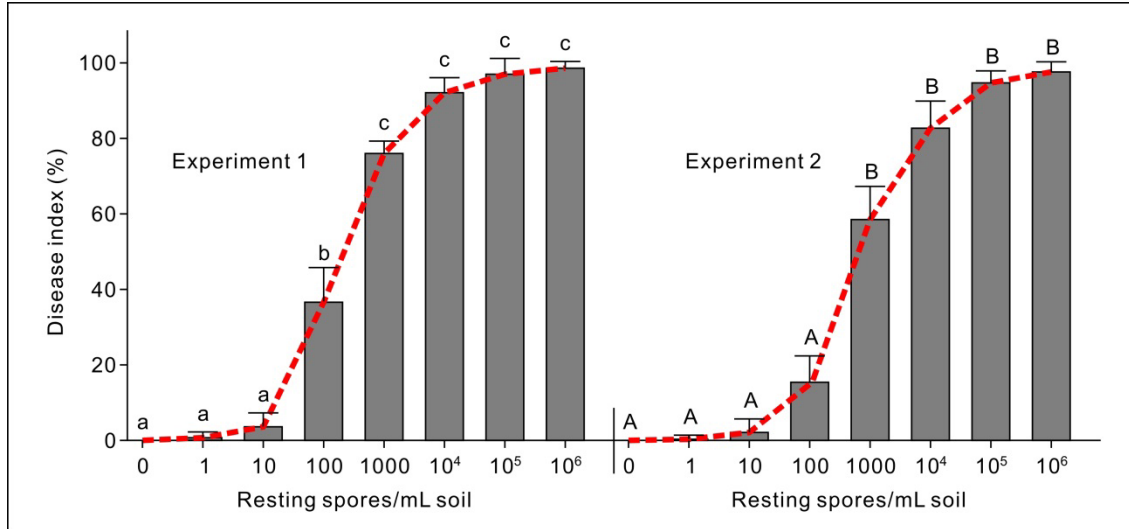

399

400

401

402 **Fig 4**

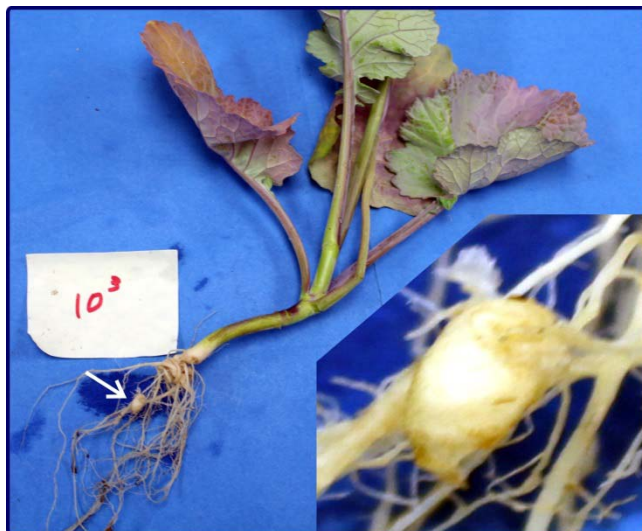

403

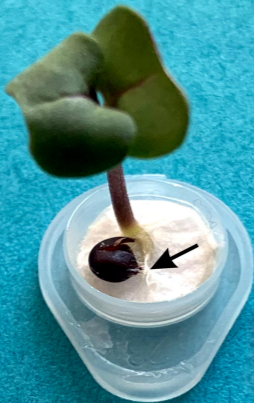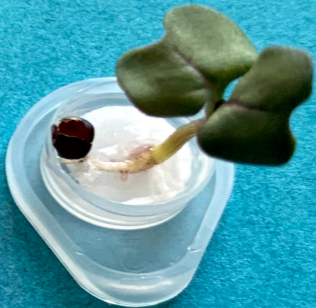

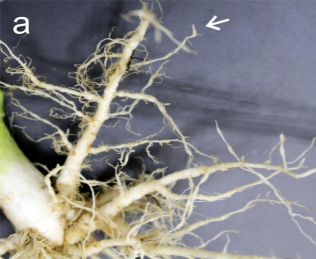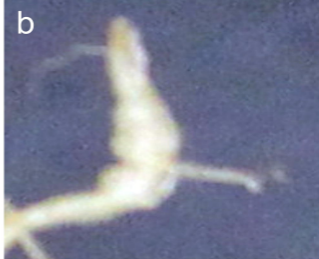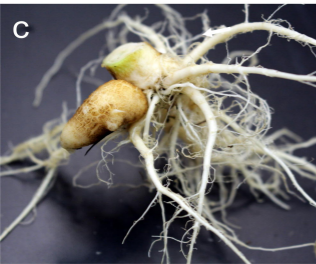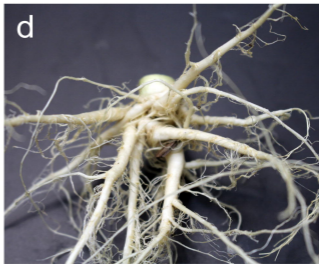

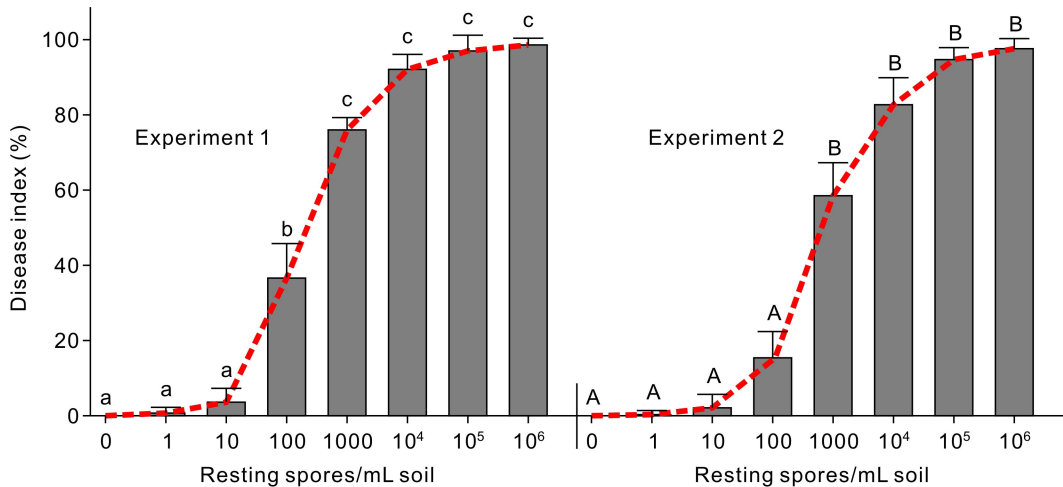

10<sup>3</sup>

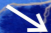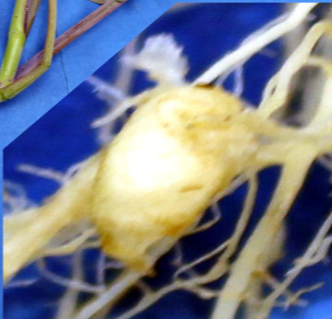

Source: https://biorxiv.org/content/10.1101/2021.05.21.445124v1.full.pdf
